# Supplementary figures and images for: Metabolic heterogeneity of idiopathic pulmonary fibrosis: a metabolomic study
Source: PubMed Central journal article supplement — BMJ Open Respir Res. 2017 Jun 5;4(1):e000183. doi: 10.1136/bmjresp-2017-000183 (PMC5531310; doi:10.1136/bmjresp-2017-000183), 2017-06-05

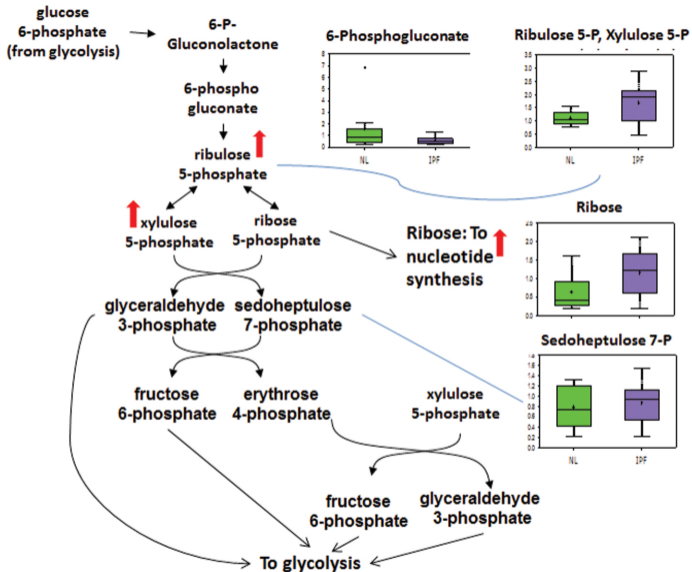

Supplement: bmjresp-2017-000183supp002.pdf [file bmjresp-2017-000183supp002.pdf]

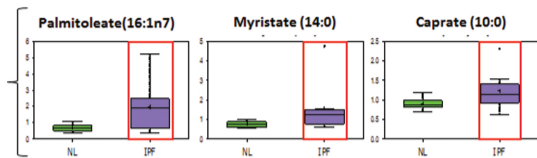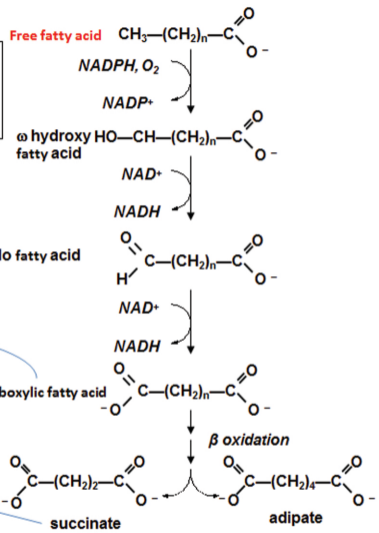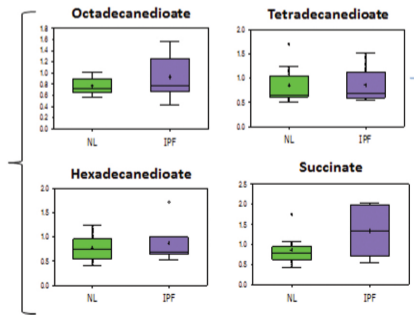

Supplement: bmjresp-2017-000183supp003.pdf [file bmjresp-2017-000183supp003.pdf]

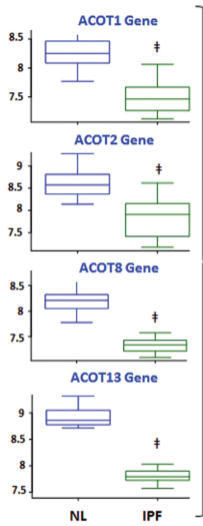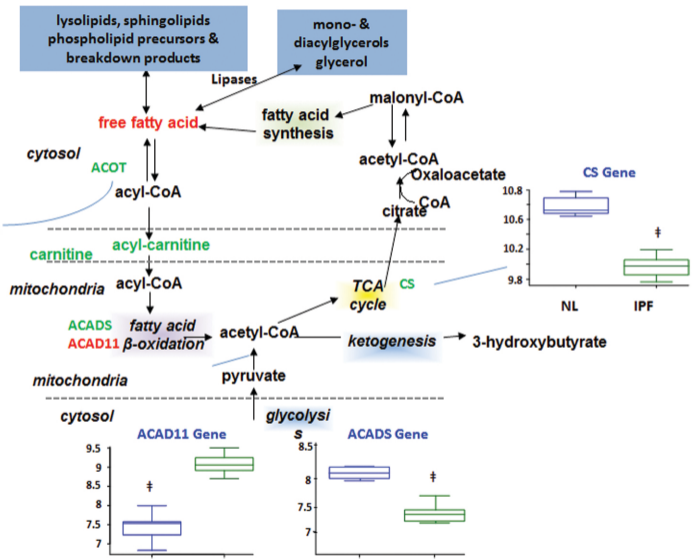

Supplement: bmjresp-2017-000183supp004.pdf [file bmjresp-2017-000183supp004.pdf]

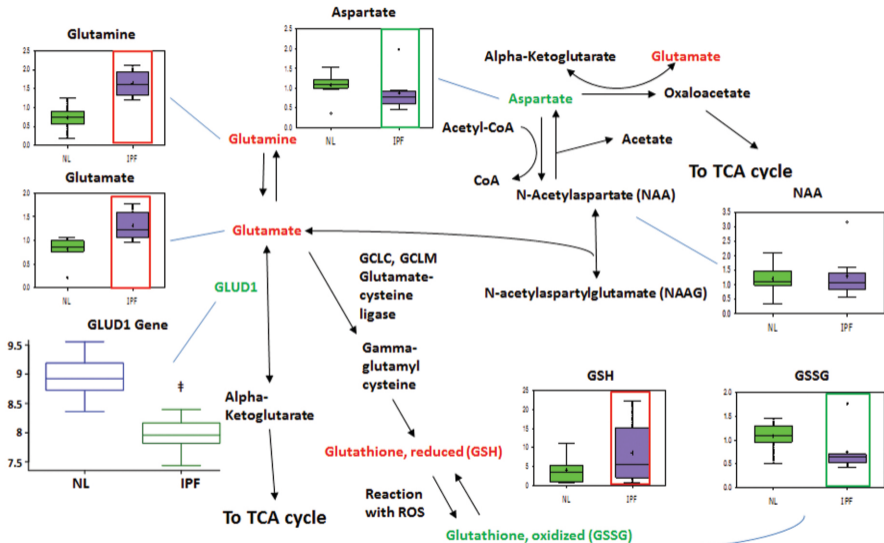

Supplement: bmjresp-2017-000183supp005.pdf [file bmjresp-2017-000183supp005.pdf]

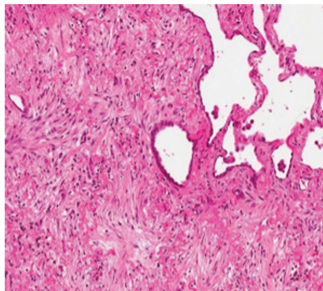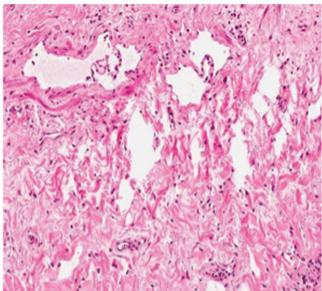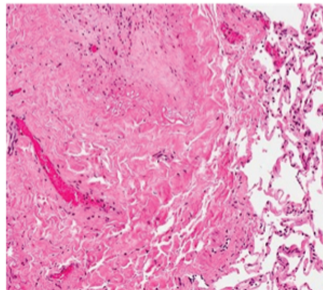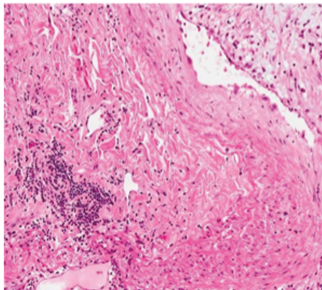

Supplement: bmjresp-2017-000183supp006.pdf [file bmjresp-2017-000183supp006.pdf]
